# Supplementary material for: Human breast cancer cells enhance self tolerance by promoting evasion from NK cell antitumor immunity
Source: JCI journal article supplement (doi:10.1172/jci45816), 2011-08-15
Supplement: sd1 [file 1]

## **Legends of the Supplemental Data:**

### **Supplemental Figure 1. p-NK-cells are phenotypically altered in breast cancer patients.**

Mono-parametric histogram representative of p-NK-cell phenotype in patients displaying different stages of breast cancer. B = mammary benign tumors; Tis = non-invasive in situ breast cancer; LOC = localized invasive breast cancer; LA = locally-advanced invasive breast cancer; M = metastatic breast cancer.

### **Supplemental Figure 2. p-NK-cells are functionally altered in breast cancer patients.**

**A.** Titration curves of NK-cells ability to mediate ADCC in the presence of increasing doses of trastuzumab. The effect of trastuzumab was measured through the degranulation (CD107) ability of p-NK-cells. Effector:Target ratio = 2:1, in a 4 hours assay. n=3 donors. **B.** *CD16* polymorphism was evaluated in the population by flow cytometry (*CD16* polymorphism affinity: VV>VF>FF, Personal communication from Dr Thibault, manuscript in preparation). For all experiments, the Effector:Target ratio was of 1:1. The number of patients included per group was as follows: B (n=10), Tis (n=7), LOC (n=16), LA (n=16), M (n=12). **C-D.** NK-cells were stimulated in a re-directed assay, using P815 cell lines pre-coated with anti-NKp30 or anti-*CD16* agonist antibody, and their functions evaluated by their ability to express membrane CD107 molecules (de-granulation assay) when exposed to target cells. The correlation between the expression level of NKp30 (**C**) or *CD16* (**D**) and the respective CD107 degranulation ability were established using the non-parametric Spearman correlation test. For all experiments, the Effector:Target ratio was of 1:1.

The statistical differences between groups were established using non-parametric Mann and Whitney t-test. p-values<0.05 were considered as significant. ns=not significant. p<0.05=\*; p≤0.05=\*\*; p≤0.0005=\*\*\*.

**Supplemental Figure 3. Phenotype of healthy or malignant mammary tissues infiltrating NK-cells and peripheral-blood NK-cells.**

**A.** Expression of NK-cells receptors on healthy Mt-NK, linked to their paired Ti-NK, and p-NK. Markers significantly altered in the healthy mammary tissue compared to p-NK (tissue-induced modifications) are squared in green. The statistical differences between groups were established using paired non-parametric Wilcoxon t-test. **B.** Correlation curves between the MFI of NKp30, CD16, NKG2A and CD16 on p-NK-cells and Ti-NK-cells (n = 11). Statistical analysis and correlation coefficients were established with non-parametric Spearman tests. p-values<0.05 were considered as significant. ns=not significant. p<0.05=\*; p≤0.05=\*\*; p≤0.0005=\*\*\*.

**Supplemental Figure 4. mRNA expression of the known NK-cell receptor ligands in breast cancer.** Affymetrix data of breast cancers (n= 250) and healthy mammary tissue (n=5) were downloaded from the public GEO datasets (GEO:<http://www.ncbi.nlm.nih.gov/gate2.inist.fr/pubmed/>, GSE21653). We used the Robust Multichip Average (RMA) with the non-parametric quantile algorithm as normalization parameter. Quantile normalization or RMA was done in R using Bioconductor and associated packages. mRNA values of the NK-cell receptor ligands were extracted, centered on healthy mammary tissue to obtain the differential expression and then submitted to a clustering software (Cluster®: linearization of the data, mean centered on gene); the results are visualized with Treeview®. The

receptors of the known ligands of interest are: KIRs (HLA-A, HLA-B, HLA-C, HLA-G), NKG2A (HLA-E), NKp30 (BAT-3, B7H6 or NKp30L), DNAM-1 (PVR and Nectin2), NKG2D (MIC-A, MIC-B, ULBP-1, ULBP-2 and ULBP-3). Healthy mammary tissue cluster are squared in yellow dashed line.

**Supplemental Figure 5. Levels of TGF- $\beta$ 1, PGE<sub>2</sub>, LGALS3 , ADAM17 and sMICA in malignant and healthy breast tissues measured by ELISA.**

**A.** TGF- $\beta$ 1; **B.** PGE<sub>2</sub>; **C.** LGALS3; **D.** ADAM17; **E.** sMICA;

**Supplemental Figure 6. The proportion of Treg infiltrates were negatively correlated with the cytotoxic molecules CD57 and GZMB expressed in Ti-NK-cells.**

**A.** Percentage of Treg in p-blood, healthy mammary tissue and in tumor. **B.** Correlation between Treg infiltrates and CD57 expression on NK-cells. **C.** Correlation between Treg infiltrates and GZMB expression on NK-cells. Statistics and correlation coefficient were established with non-parametric Pearson tests. p-values<0.05 were considered as significant. ns=not significant. p<0.05=\*; p≤0.05=\*\*; p≤0.0005=\*\*\*.

**Supplemental Figure 7. Tumor cells alter NK-cells phenotype and function in the MMTV-Neu murine model of breast cancer.**

FVB control mice (n=6, light grey bars) and MMTV-Neu mice (n=6, dark grey bars) were followed from 3 months of age until tumor occurrence, and a Kaplan-Meier curve was established to determine tumor-free survival (**A**). Arrows indicate when the samples were collected. Mice were sacrificed during the last sample (VI). NKp46 (**B**) and NKG2A (**C**) expression were followed on NK-cells from FVB and MMTV-Neu

mice. FVB and MMTV/Neu mice were compared using non-parametric Mann and Whitney t-test. p-values<0.05 were considered as significant.  $p<0.05=*$ ;  $p\leq 0.005=**$ ;  $p\leq 0.0005=***$ .

**Supplemental Table 1. List of the antibodies (Name, Clone, Provider) used for NK-cells phenotype and functional experiments.**

| <b>mAb</b>      | <b>Clone</b> | <b>Provider</b> |
|-----------------|--------------|-----------------|
| anti-CD3        | UCHT1        | Beckman Coulter |
| anti-CD4        | 13B8.2       | Beckman Coulter |
| anti-CD16       | 3G8          | Beckman Coulter |
| anti-CD56       | N901         | Beckman Coulter |
| anti-NKp30      | 7A6          | Beckman Coulter |
| anti-NKG2D      | BAT-221      | Beckman Coulter |
| anti-NKp46      | BAB281       | Beckman Coulter |
| anti-NKp44      | Z231         | Beckman Coulter |
| anti-2B4        | PP35         | Beckman Coulter |
| anti-NKG2A      | Z270         | Beckman Coulter |
| anti-NKG2D      | ON72         | Beckman Coulter |
| anti-CD158a     | 11PB6        | Beckman Coulter |
| anti-CD158b     | GL183        | Beckman Coulter |
| anti-CD158e     | Z27          | Beckman Coulter |
| anti-CD158i     | FES172       | Beckman Coulter |
| anti-NTBA       | MA127        | Beckman Coulter |
| anti-LFA1       | JT90         | Beckman Coulter |
| anti-CD85j      | HP-F1        | Beckman Coulter |
| anti-CD2        | 39C1.5       | Beckman Coulter |
| anti-CD161      | 191B8        | Beckman Coulter |
| anti-CD57       | NC1          | Beckman Coulter |
| anti-CD25       | B1.49.9      | Beckman Coulter |
| anti-CD27       | 1A4CD27      | Beckman Coulter |
| anti-CD69       | TP1.55.3     | Beckman Coulter |
| anti-CD127      | R34.34       | Beckman Coulter |
| anti-HLA-ABC    | B9.12.1      | Beckman Coulter |
| anti-IFN-gamma  | 45.15        | Beckman Coulter |
| anti-DNAM-1     | F22          | BD Pharmingen   |
| anti-Perforin   | δG9          | BD Pharmingen   |
| anti-Granzyme-B | GB11         | BD Pharmingen   |
| anti-CD31       | M89D3        | BD Pharmingen   |
| anti-TNF-alpha  | 6401.1111    | BD Pharmingen   |
| anti-MIC-A/B    | 6D4          | BD Pharmingen   |
| 7-AAD           |              | BD Pharmingen   |
| anti-TRAIL      | 75402        | R&D System      |
| anti-NKG2C      | 134591       | R&D System      |
| anti-NKp80      | 239127       | R&D System      |
| anti-LAIR       | 342219       | R&D System      |
| DNAM-1-FC       | recombinant  | R&D System      |
| NKp30-Fc        | recombinant  | R&D System      |
| anti-ULBP1      | 170818       | R&D System      |
| anti-ULBP2      | 165903       | R&D System      |
| anti-ULBP3      | 166510       | R&D System      |
| anti-HLA-E      | 3D12HLA-E    | eBioscience     |

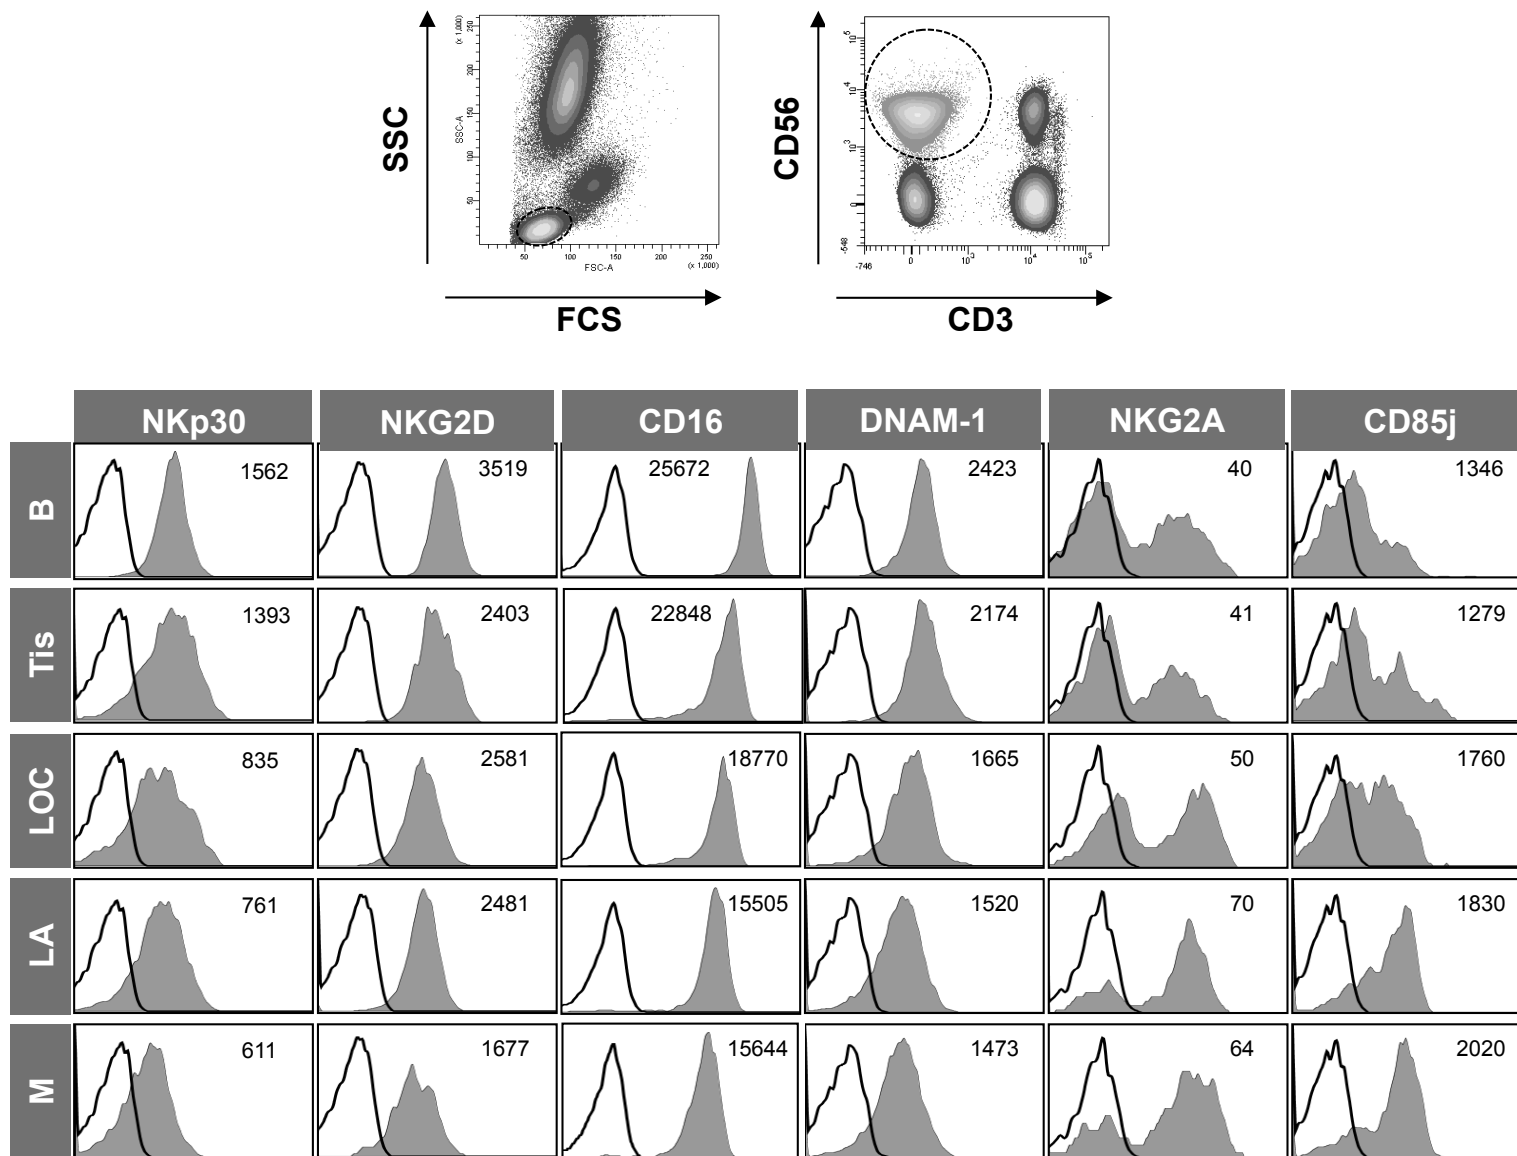

**Supplemental Figure 1.** p-NK-cells are phenotypically altered in breast cancer patients.

**A**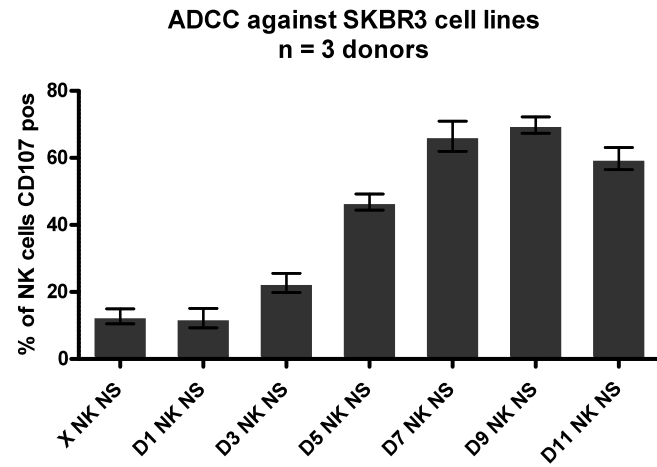**B**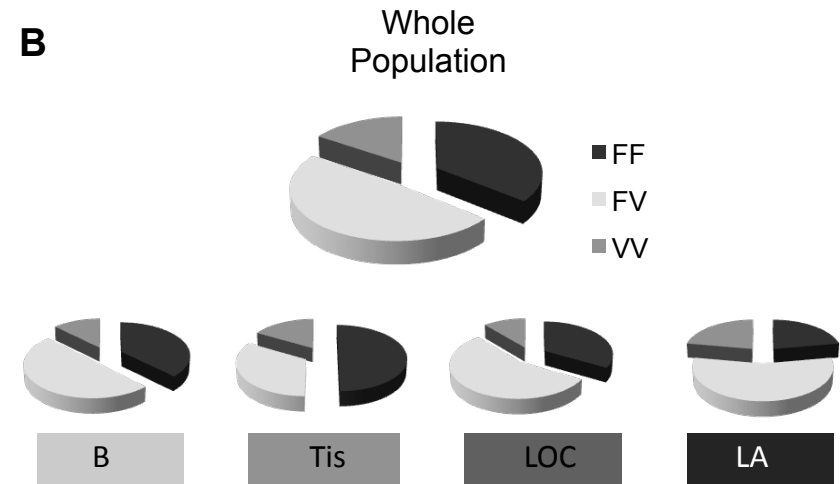**C**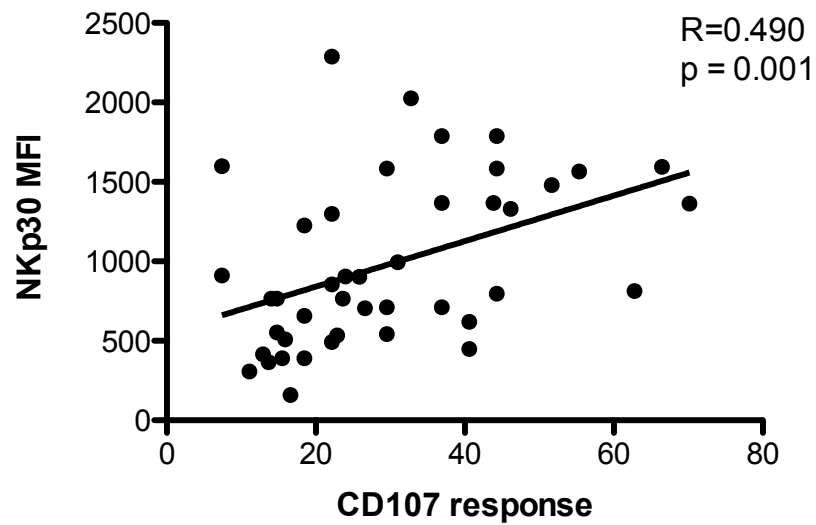**D**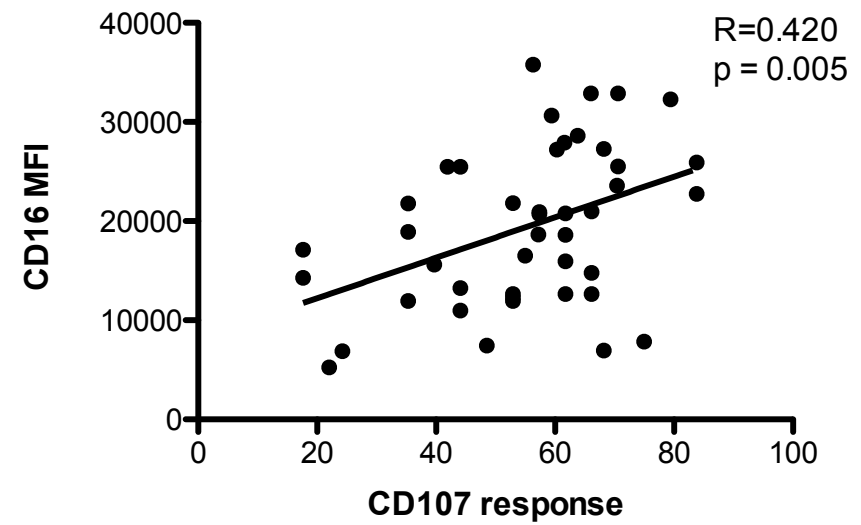

**Supplemental Figure 2.** p-NK-cells are functionally altered in breast cancer patients.

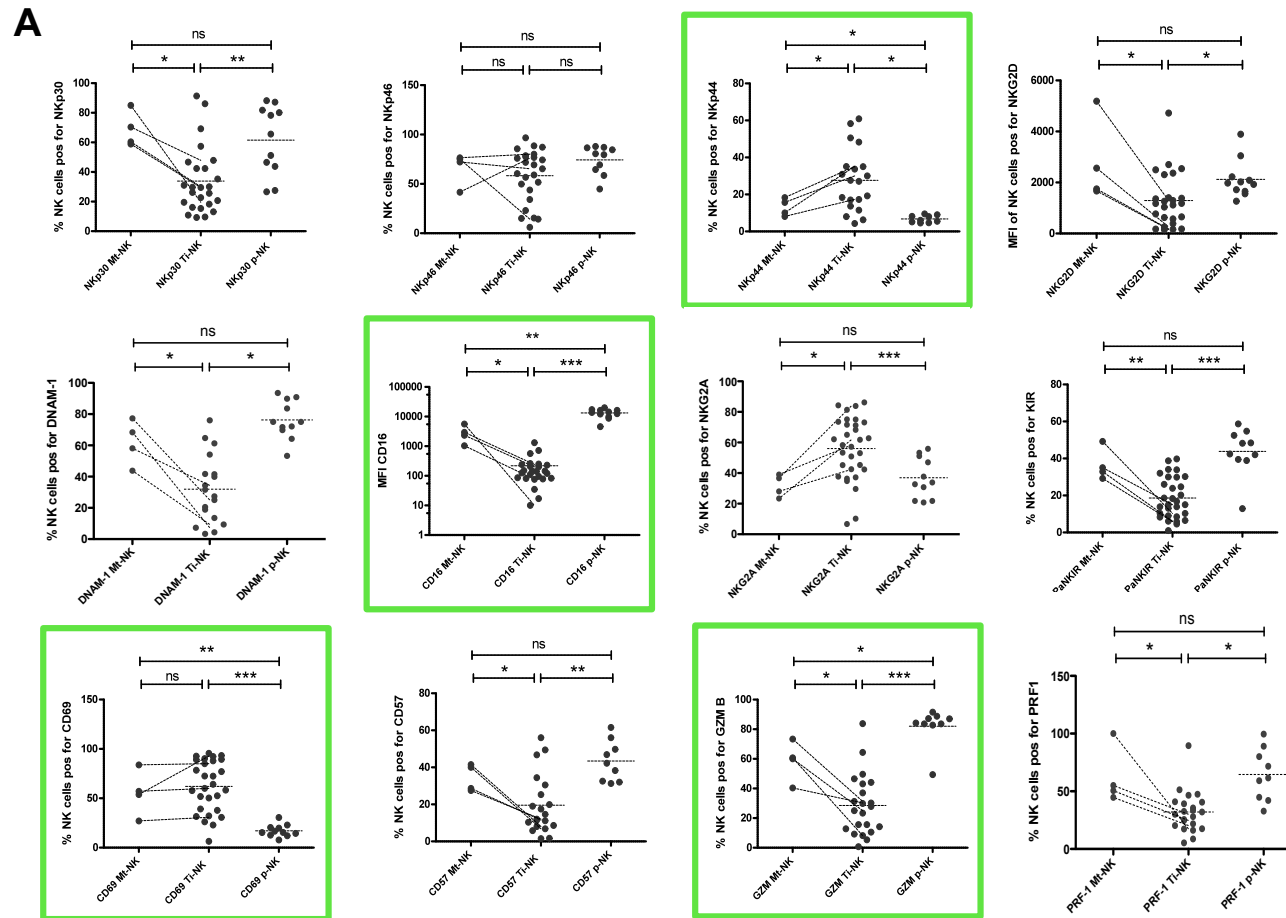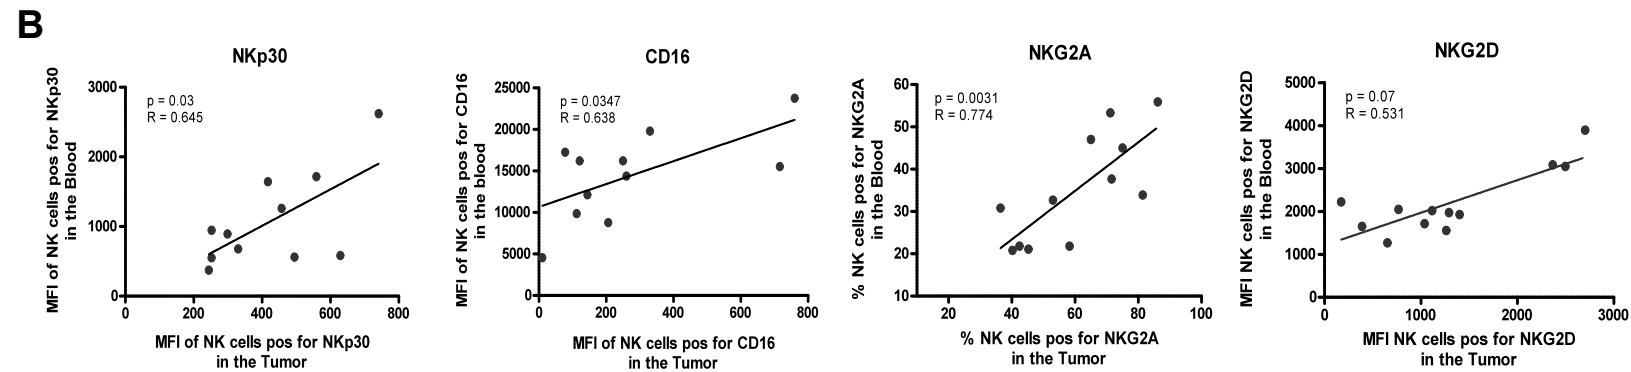

**Supplemental Figure 3.** Phenotype of tissues infiltrating and peripheral blood NK-cells.



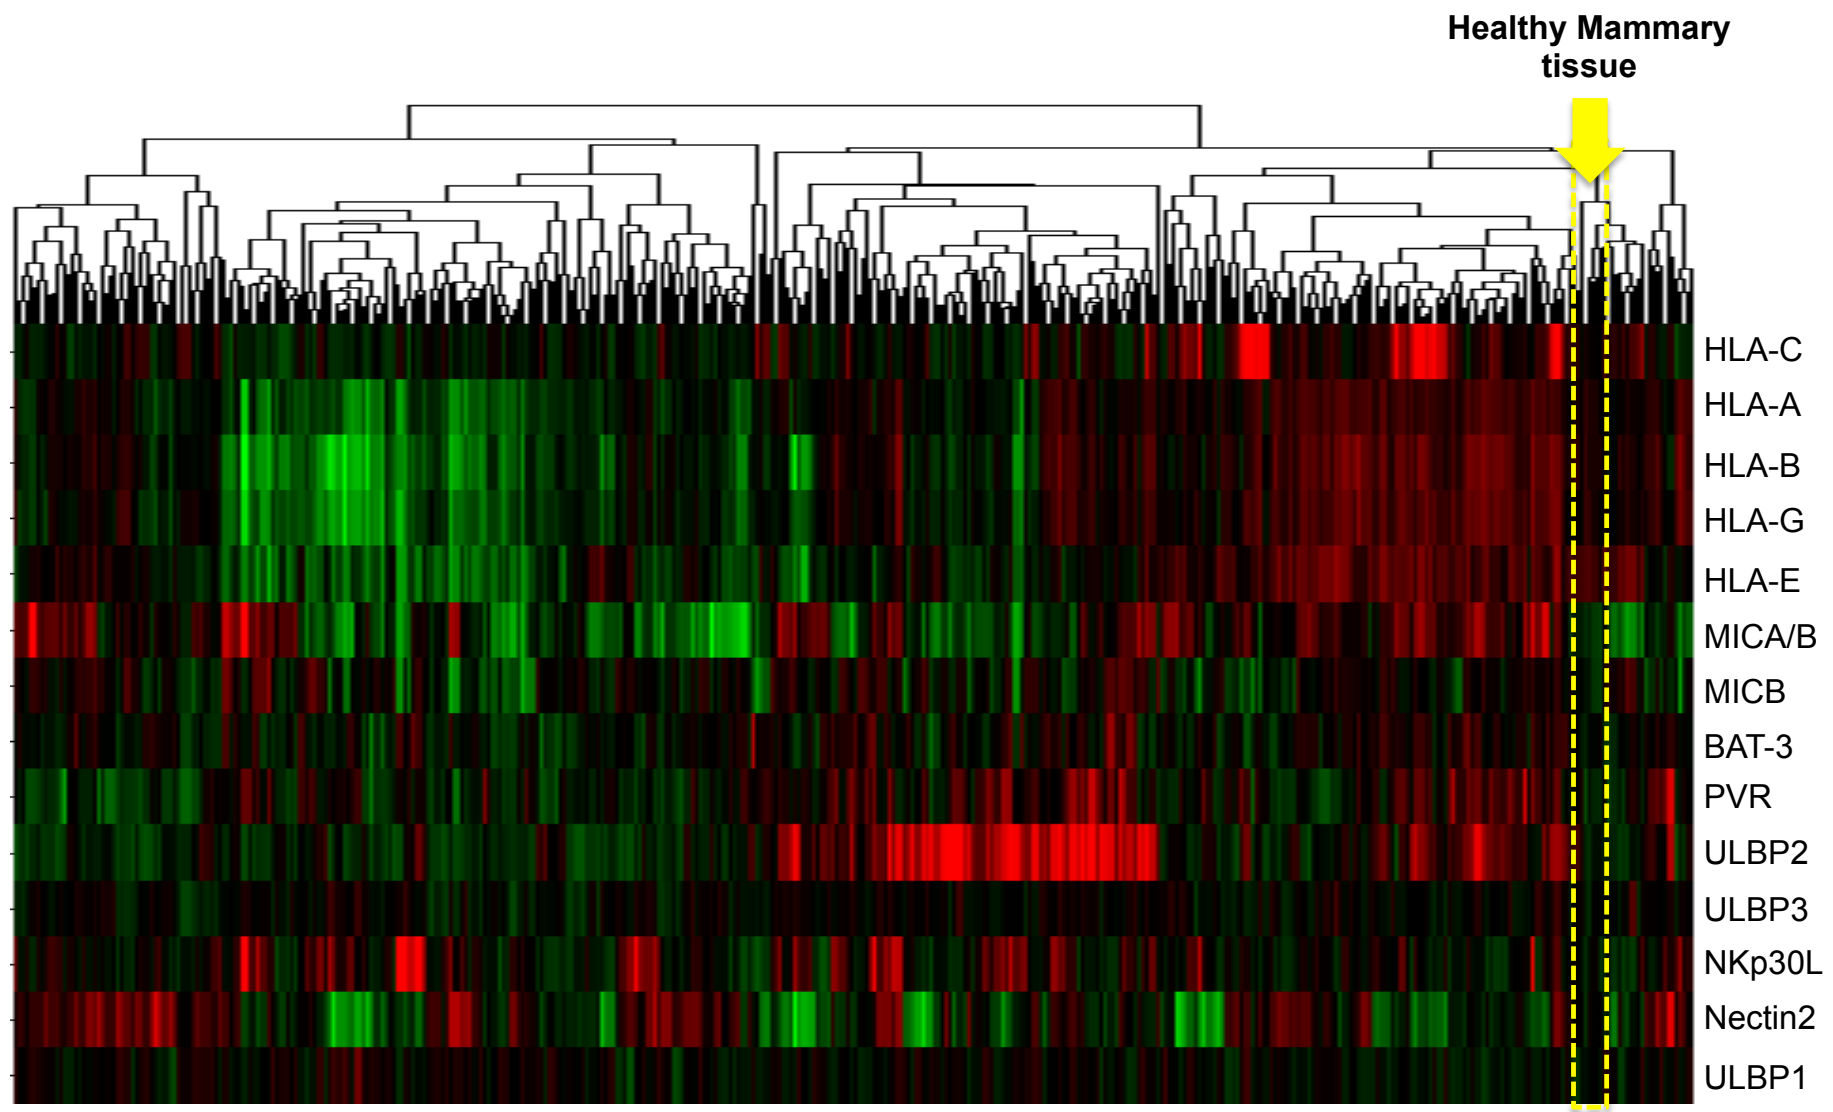

**Supplemental Figure 4.** mRNA expression of the known NK-cell receptor ligands in breast cancer.

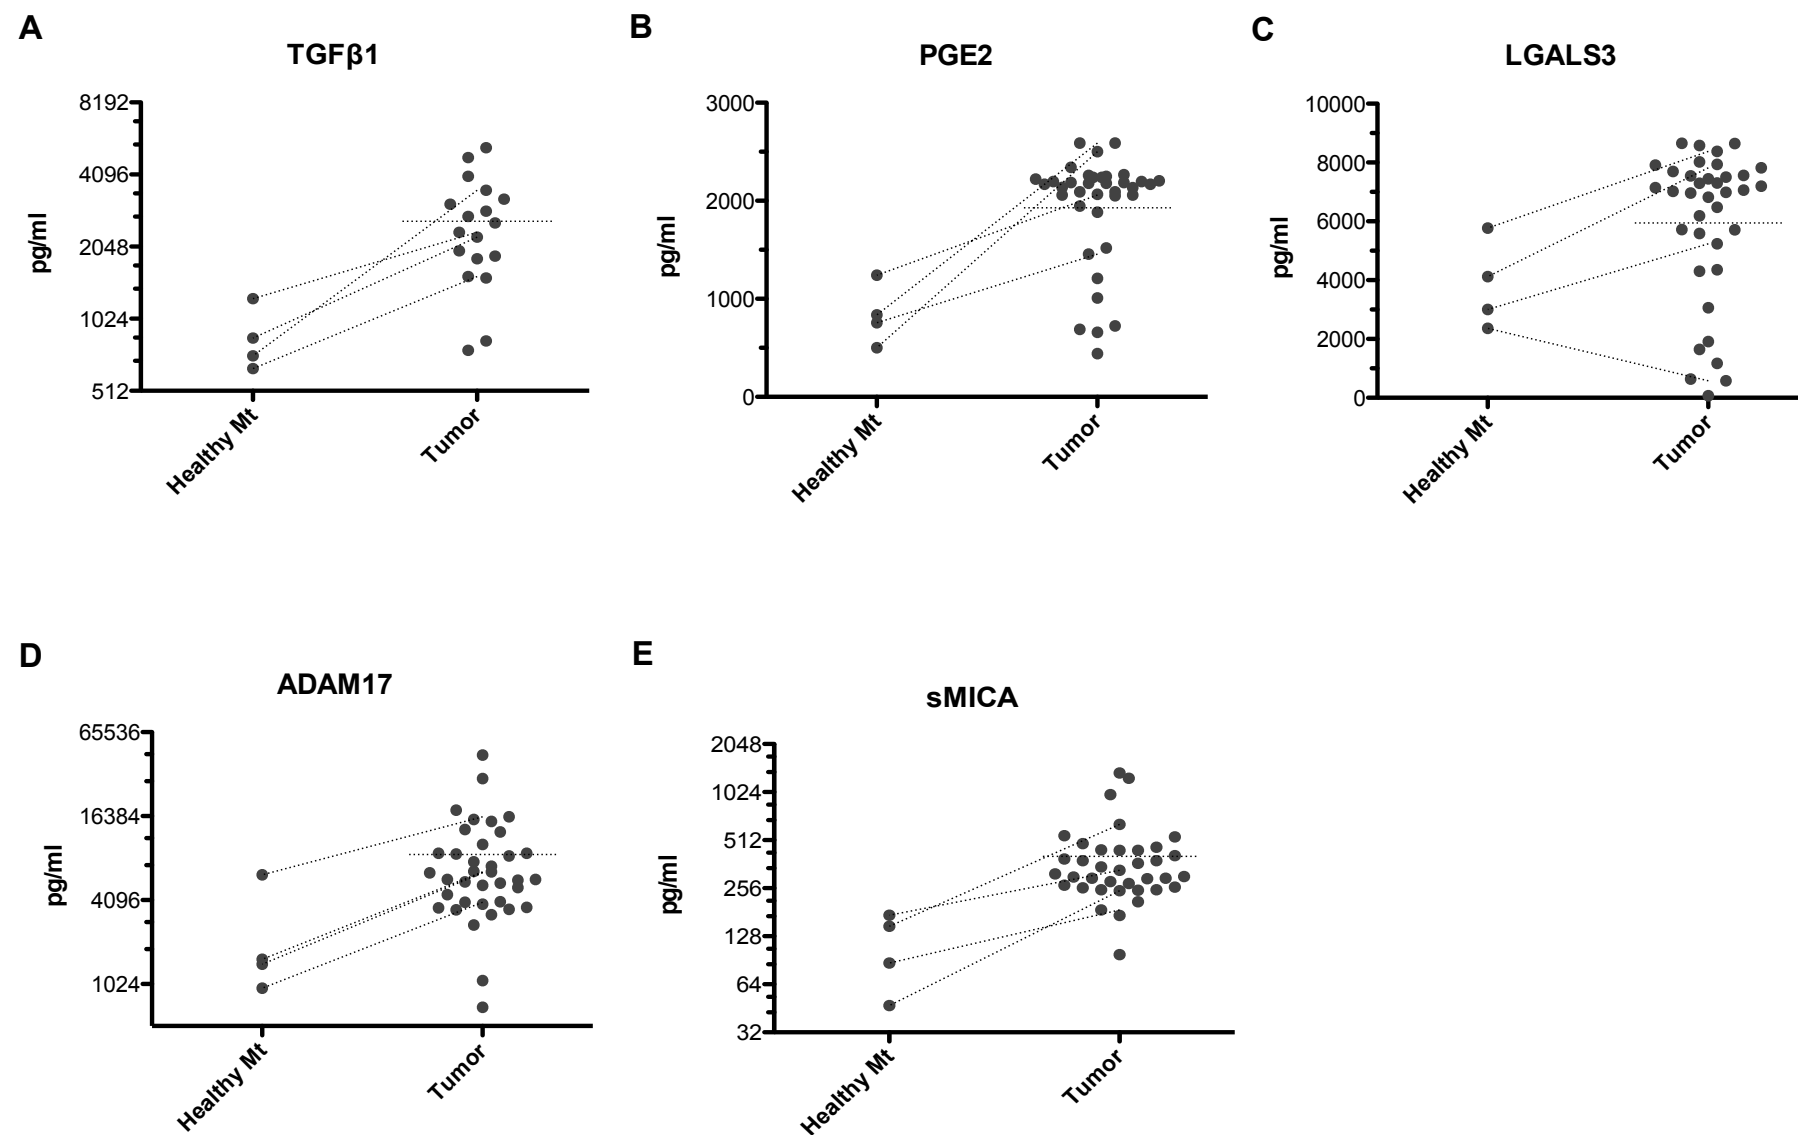

**Supplemental Figure 5.** Levels of TGF- $\beta$ 1, PGE<sub>2</sub>, LGALS3, ADAM17 and sMICA in malignant and healthy breast tissues measured by ELISA.

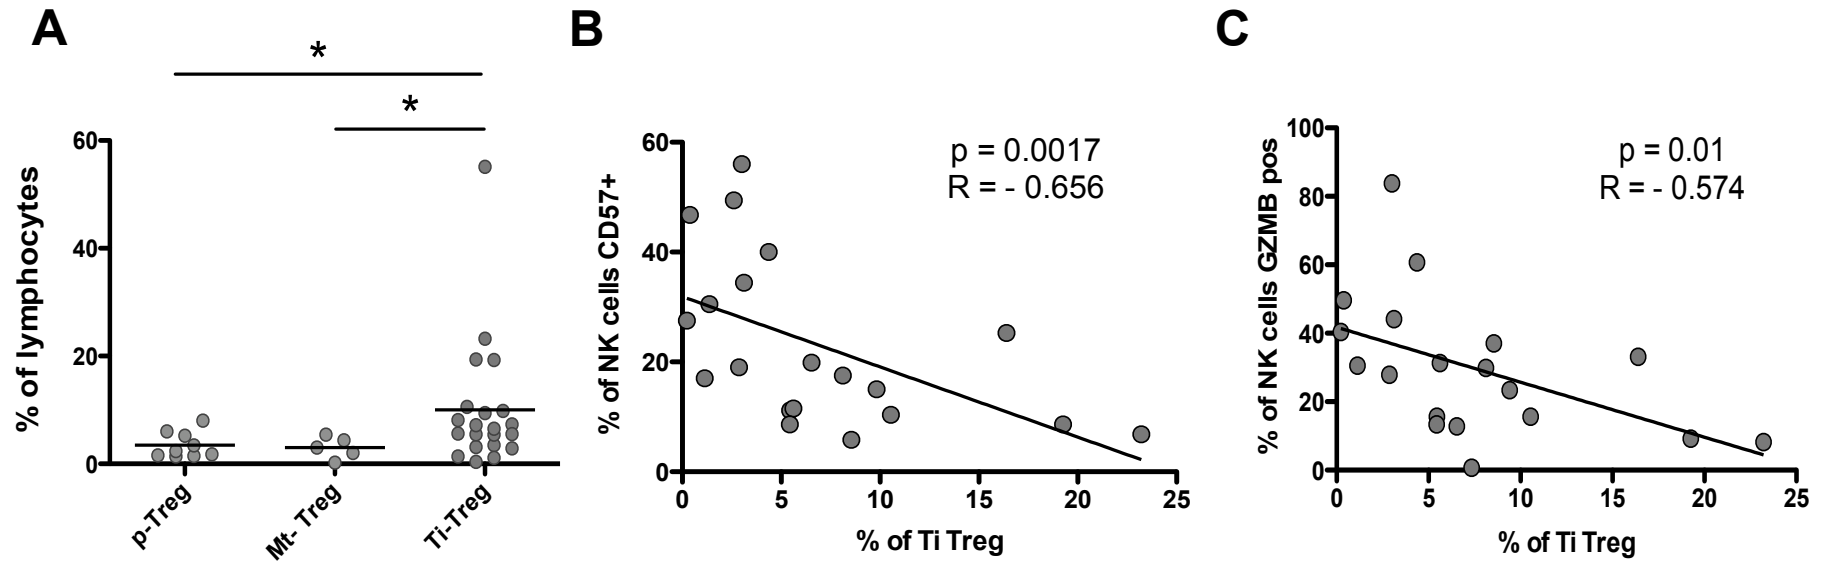

**Supplemental Figure 6.** The proportion of Treg infiltrates were negatively correlated with the cytotoxic molecules CD57 and GZMB expressed in Ti-NK-cells.

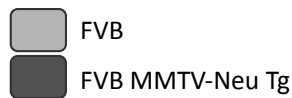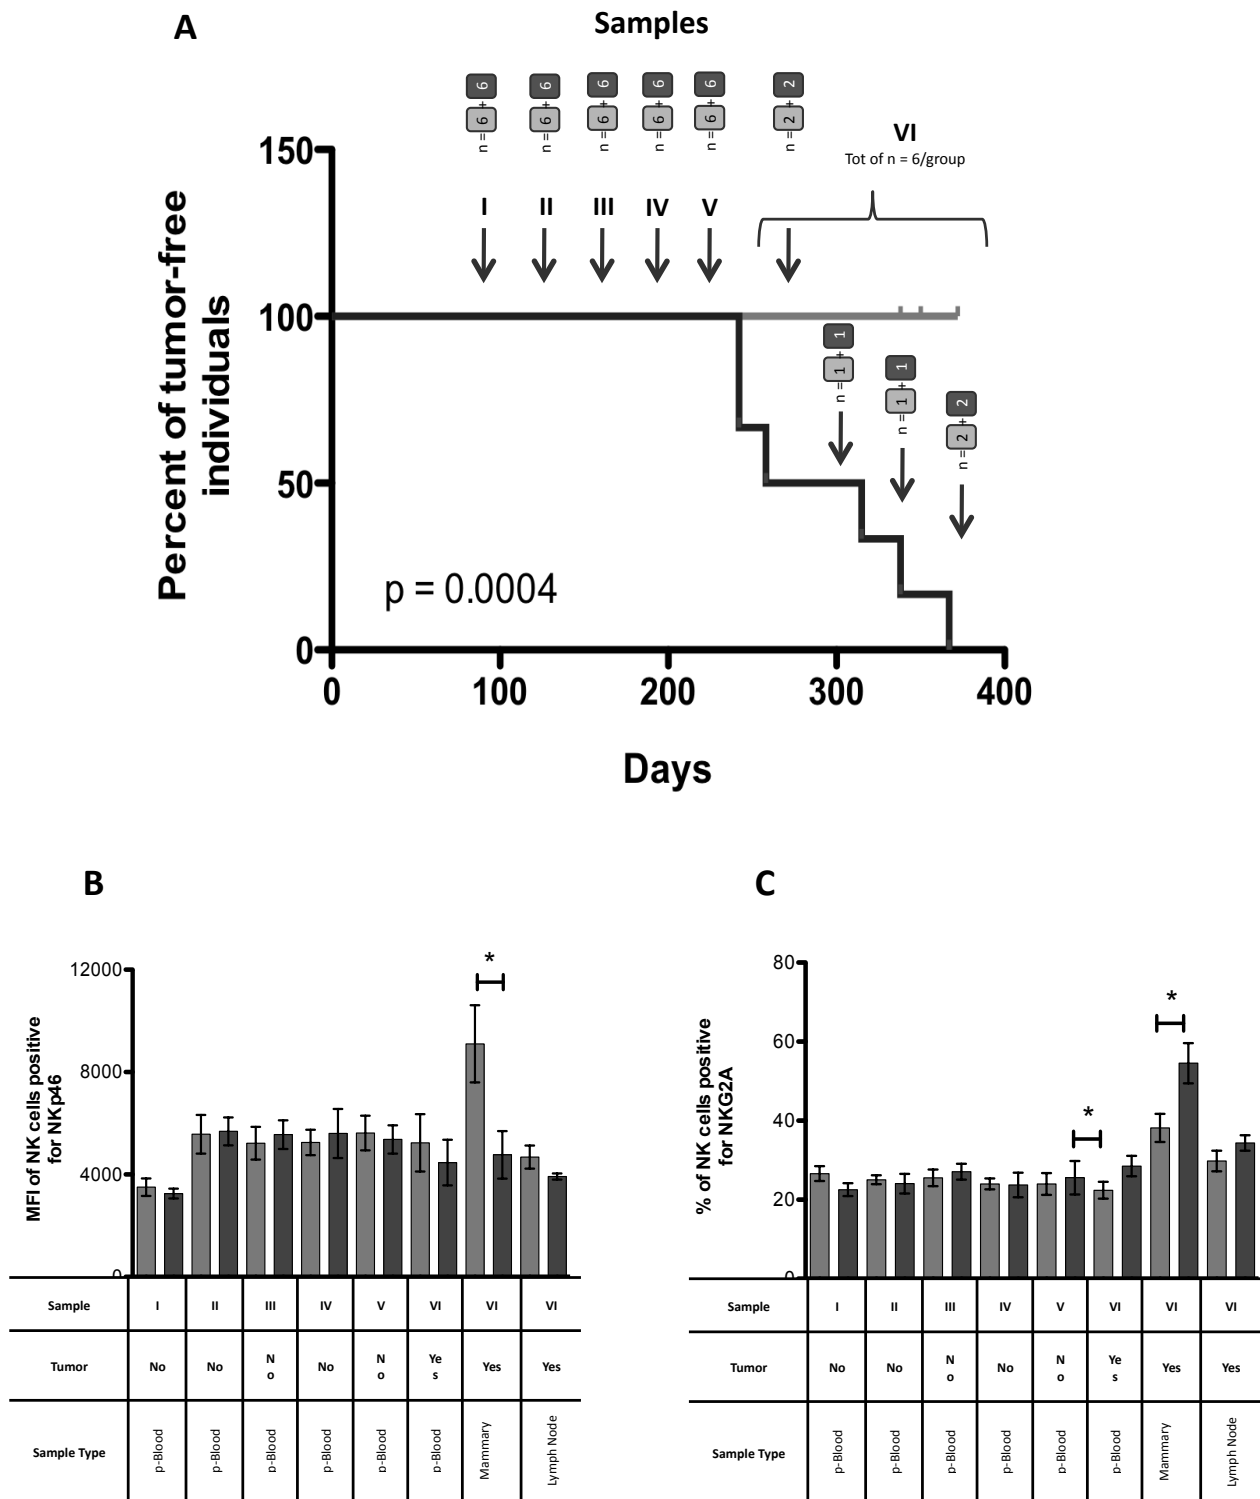

**Supplemental Figure 7.** Tumor cells alter NK-cells phenotype and function in the MMTV-Neu murine model of breast cancer.
